# Supplementary material for: Histone deacetylase inhibitor, suberoylanilide hydroxamic acid (SAHA), enhances anti-tumor effects of the poly (ADP-ribose) polymerase (PARP) inhibitor olaparib in triple-negative breast cancer cells
Source: PubMed Central journal article supplement (PMC4425881; doi:10.1186/s13058-015-0534-y), 2015-03-07

Figure S1

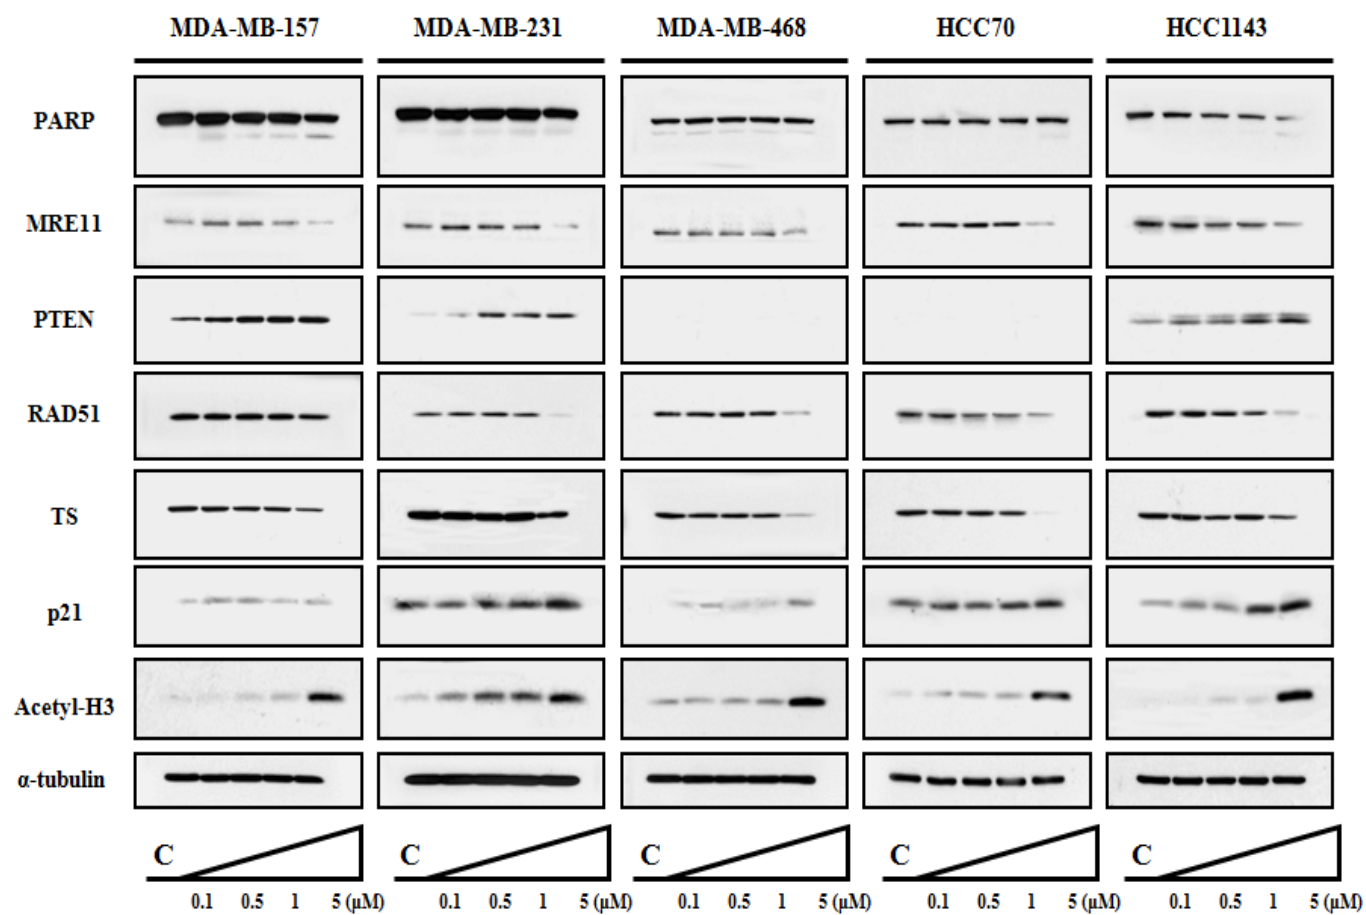

Supplement: 13058_2015_534_MOESM1_ESM.pdf [file 13058_2015_534_MOESM1_ESM.pdf]
