# Supplementary material for: Histone deacetylase inhibitor, suberoylanilide hydroxamic acid (SAHA), enhances anti-tumor effects of the poly (ADP-ribose) polymerase (PARP) inhibitor olaparib in triple-negative breast cancer cells
Source: Springer Nature journal article supplement (doi:10.1186/s13058-015-0534-y), 2015-03-06
Supplement: MOESM2 [file 9781366]

**Table S1****Combined effects of olaparib and SAHA on human breast cancer cell lines**

| Cell lines | BRCA1 | BRCA2 | PTEN           | Olaparib IC <sub>50</sub><br>( $\mu\text{mol/L}$ , mean $\pm$ SD) | SAHA IC <sub>50</sub><br>( $\mu\text{mol/L}$ , mean $\pm$ SD) | 1:1 combination IC <sub>50</sub><br>( $\mu\text{mol/L}$ , mean $\pm$ SD) | Combination index<br>(ED50) |
|------------|-------|-------|----------------|-------------------------------------------------------------------|---------------------------------------------------------------|--------------------------------------------------------------------------|-----------------------------|
| MDA-MB-157 | WT    | WT    | WT             | >10                                                               | 6.9 $\pm$ 0.42                                                | 2.23 $\pm$ 0.17                                                          | 0.37953                     |
| MDA-MB-231 | WT    | WT    | WT             | 6.34 $\pm$ 0.17                                                   | 5.31 $\pm$ 0.27                                               | 0.99 $\pm$ 0.01                                                          | 0.28676                     |
| MDA-MB-468 | WT    | WT    | Loss           | 3.63 $\pm$ 0.11                                                   | 1.12 $\pm$ 0.07                                               | 1.59 $\pm$ 0.24                                                          | 1.94014                     |
| BT-549     | WT    | WT    | Low expression | 4.72 $\pm$ 0.06                                                   | 2.74 $\pm$ 0.06                                               | 0.74 $\pm$ 0.12                                                          | 0.70756                     |
| HCC70      | WT    | WT    | Loss           | >10                                                               | 1.78 $\pm$ 0.01                                               | 0.84 $\pm$ 0.04                                                          | 1.42551                     |
| HCC1143    | WT    | WT    | WT             | >10                                                               | 6.71 $\pm$ 0.14                                               | 2.02 $\pm$ 0.06                                                          | 0.36249                     |
| Hs578T     | WT    | WT    | WT             | >10                                                               | 3.81 $\pm$ 0.31                                               | 1.76 $\pm$ 0.08                                                          | 0.9453                      |
| T47D       | WT    | WT    | WT             | >10                                                               | 1.94 $\pm$ 0.02                                               | 1.31 $\pm$ 0.07                                                          | 2.88855                     |
| MCF7       | WT    | WT    | WT             | >10                                                               | 1.84 $\pm$ 0.08                                               | 0.66 $\pm$ 0.02                                                          | 0.99978                     |
| SK-BR-3    | WT    | WT    | WT             | >10                                                               | 2.87 $\pm$ 0.13                                               | 0.77 $\pm$ 0.08                                                          | 0.42673                     |
| MDA-MB-453 | WT    | WT    | WT             | 5.39 $\pm$ 0.54                                                   | 0.97 $\pm$ 0.01                                               | 0.96 $\pm$ 0.07                                                          | 2.2001                      |
| MCF10A     | WT    | WT    | WT             | >10                                                               | >10                                                           | >10                                                                      | 1573                        |
