# Supplementary material for: Histone deacetylase inhibitor, suberoylanilide hydroxamic acid (SAHA), enhances anti-tumor effects of the poly (ADP-ribose) polymerase (PARP) inhibitor olaparib in triple-negative breast cancer cells
Source: Springer Nature journal article supplement (doi:10.1186/s13058-015-0534-y), 2015-03-06

**Figure S2**

**A.**

**Antagonistic cell growth inhibition**

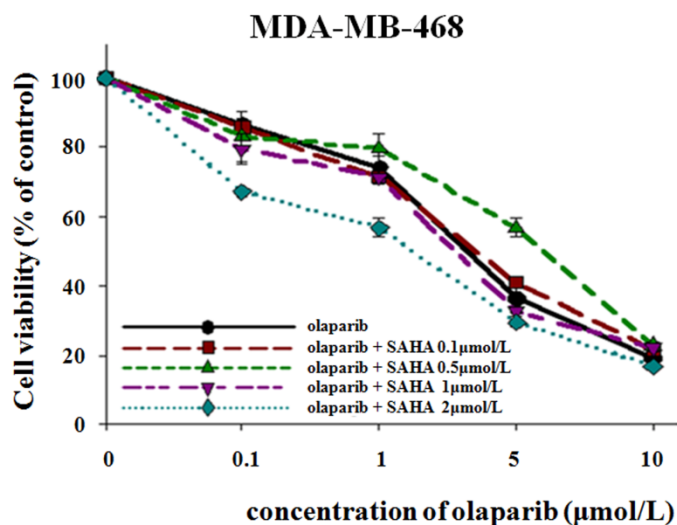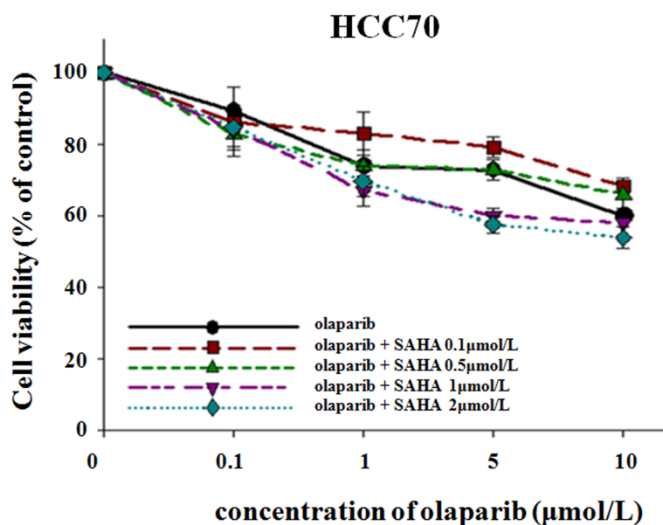

**B.**

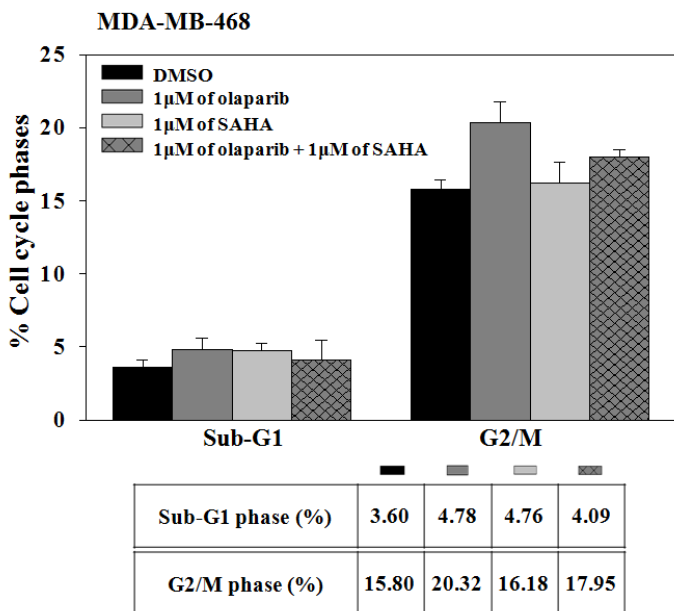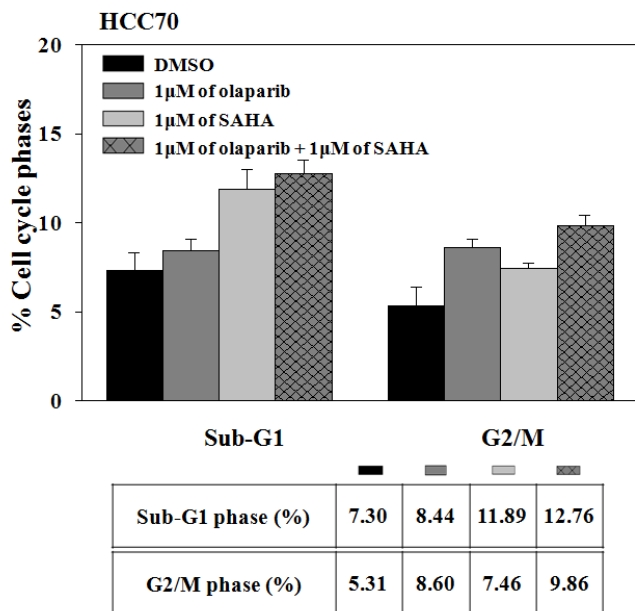

Supplement: MOESM3 [file 9781366]
